# Supplementary material for: Rectangular Transition Metal-rTCNQ Organic Frameworks Enabling Polysulfide Anchoring and Fast Electrocatalytic Activity in Li-Sulfur Batteries: A Density Functional Theory Perspective
Source: MDPI journal article supplement (doi:10.3390/molecules28052389), 2023-03-05
Supplement: s1 [file s1]

# Rectangular Transition Metal-rTCNQ Organic Frameworks Enabling Polysulfide Anchoring and Fast Electrocatalytic Activity in Li-sulfur Batteries: A Density Functional Theory Perspective

Jie-Zhen Xia <sup>1,2,3,†</sup>, Lu-Chao Zhao <sup>1,2,3,†</sup>, Man-Hua Liao <sup>1,2,3,†</sup> and Qi Wu <sup>1,2,3,\*</sup>

<sup>1</sup> School of Science, Tibet University, Lhasa 850000, China; xia\_zangda@163.com (J.-Z.X.); zlc\_zangda@163.com (L.-C.Z.); liaozangda@163.com (M.-H.L.)

<sup>2</sup> Institute of Oxygen Supply, Center of Tibetan Studies (Everest Research Institute), Tibet University, Lhasa, 850000, China

<sup>3</sup> Key Laboratory of Cosmic Rays, Tibet University, Ministry of Education, Lhasa 850000, China

\* Correspondence: wuqi@utibet.edu.cn

† The authors contributed equally to this work.

The supplementary materials include two parts (**1. Supplementary figures** and **2. Supplementary tables**).

# 1. Supplementary Figures

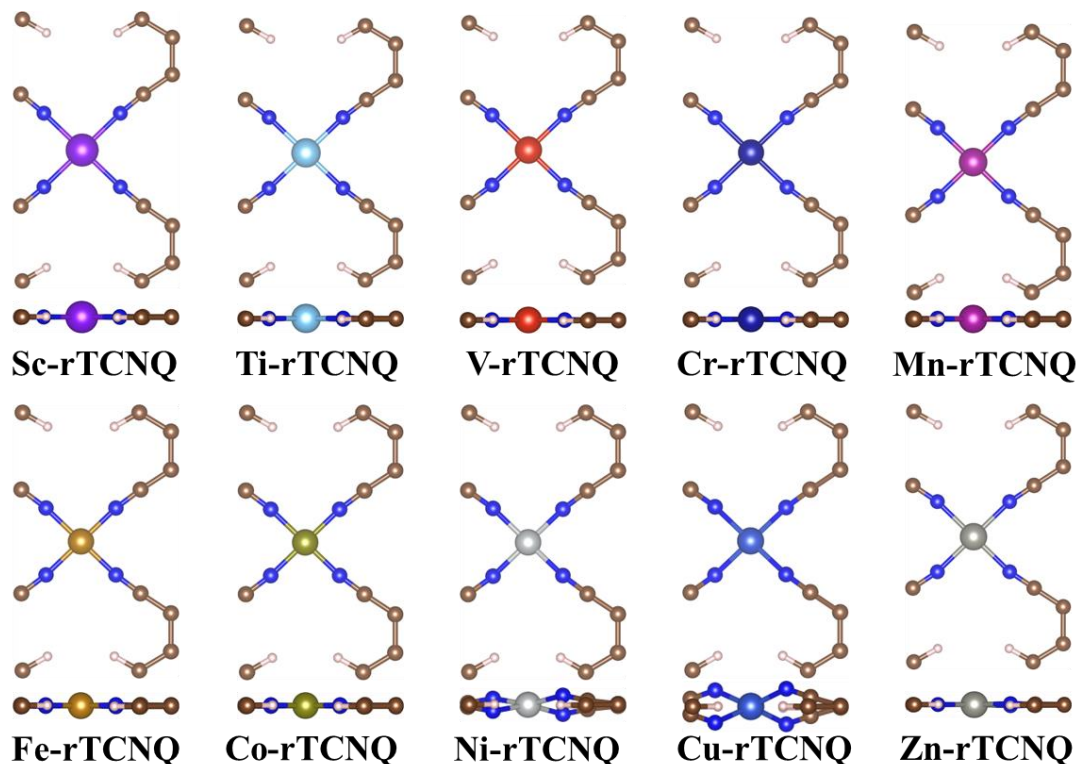

**Figure S1.** The fully optimized unit cell of TM-rTCNQ (TM = Sc, Ti, V, Cr, Mn, Fe, Co, Ni, Cu and Zn) monolayers.

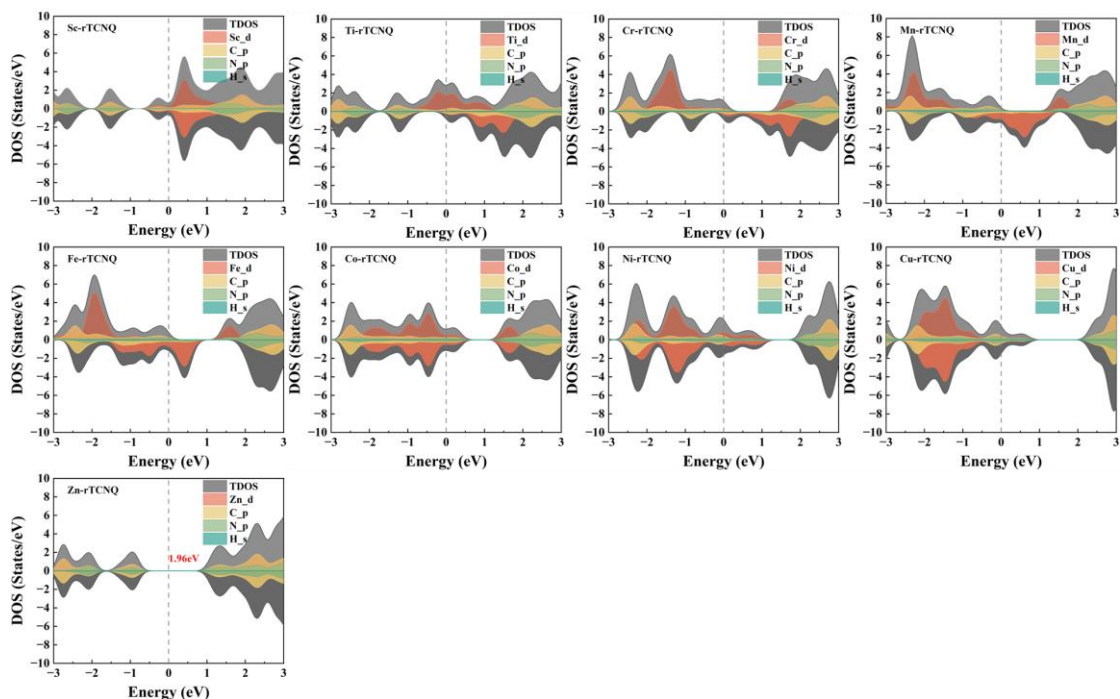

**Figure S2.** The DOS diagrams of TM-rTCNQ (TM = Sc, Ti, Cr, Mn, Fe, Co, Ni, Cu and Zn) unit cell, including the total DOS (TDOS), the projected DOS of  $d$  orbital of TM (TM<sub>d</sub>),  $p$  orbital of C and N (C<sub>p</sub> and N<sub>p</sub>), as well as  $s$  orbital of H (H<sub>s</sub>). Fermi-level is at the position of gray dotted line.

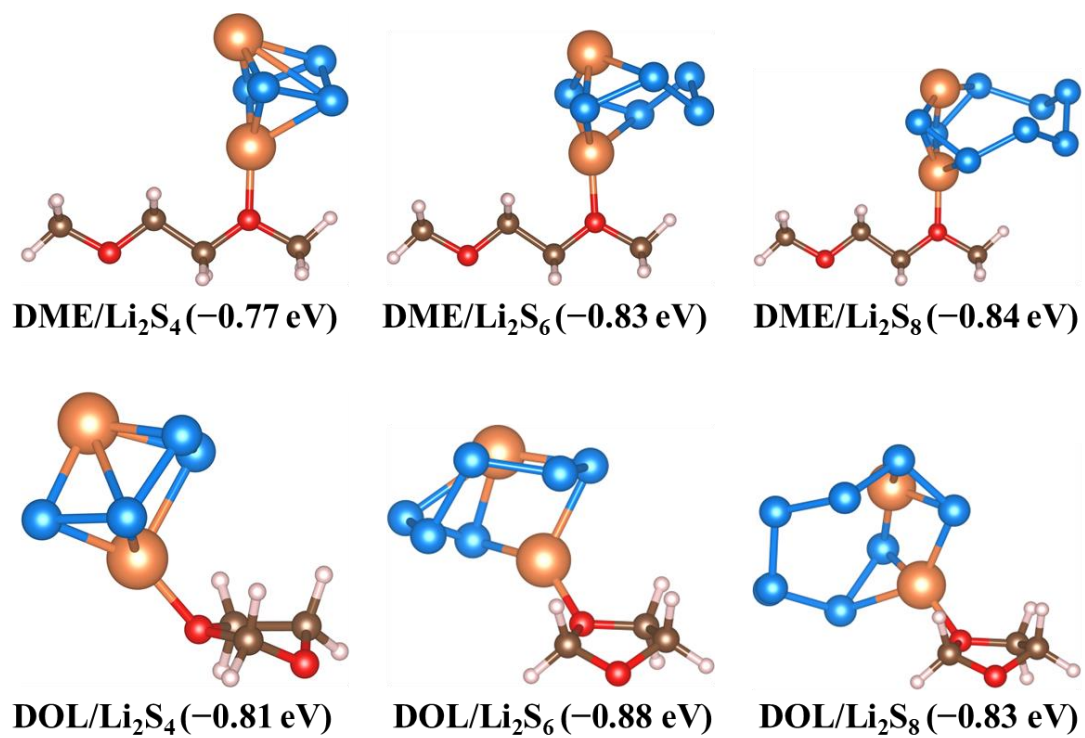

**Figure S3.** The stable adsorption configurations and energies of 1,3-dioxolane (DOL) and 1,2-dimethoxyethane (DME) solvent molecules for soluble polysulfides (Li<sub>2</sub>S<sub>4</sub>, Li<sub>2</sub>S<sub>6</sub>, and Li<sub>2</sub>S<sub>8</sub>).

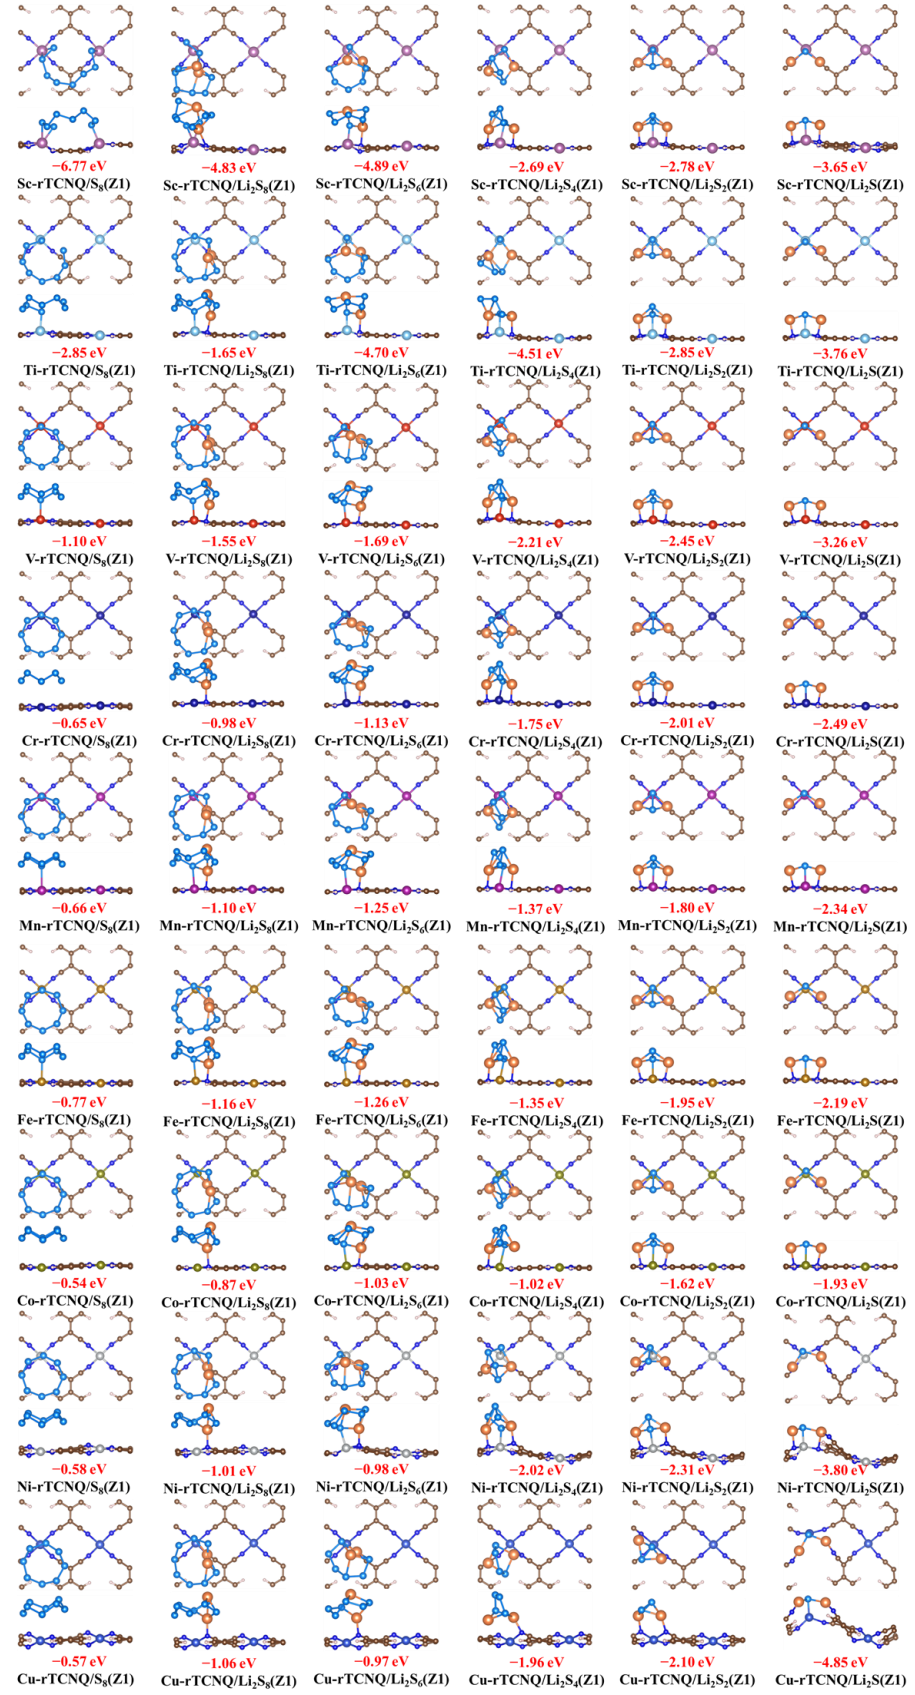

**Figure S4.** The most stable adsorption configurations and energies of TM-rTCNQ (TM = Sc, Ti, V, Cr, Mn, Fe, Co, Ni and Cu) for S<sub>8</sub>/LiPSs clusters in the Z1 adsorption pattern.

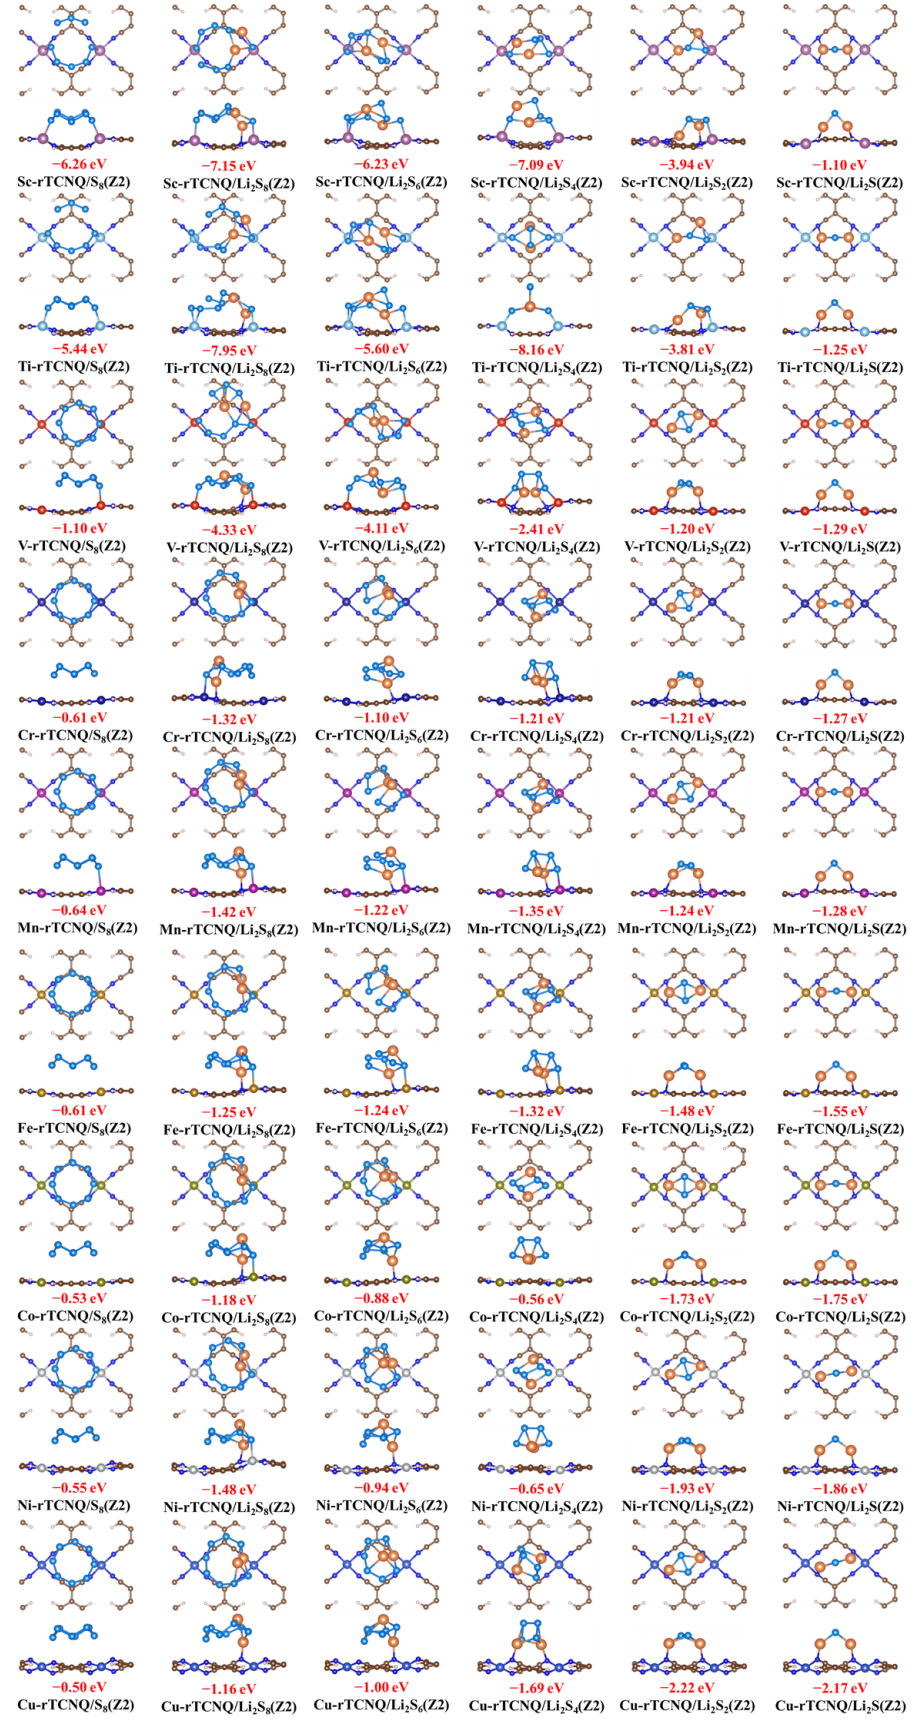

**Figure S5.** The most stable adsorption configurations and energies of TM-rTCNQ (TM = Sc, Ti, V, Cr, Mn, Fe, Co, Ni and Cu) for S<sub>8</sub>/LiPSs clusters in the Z2 adsorption pattern.



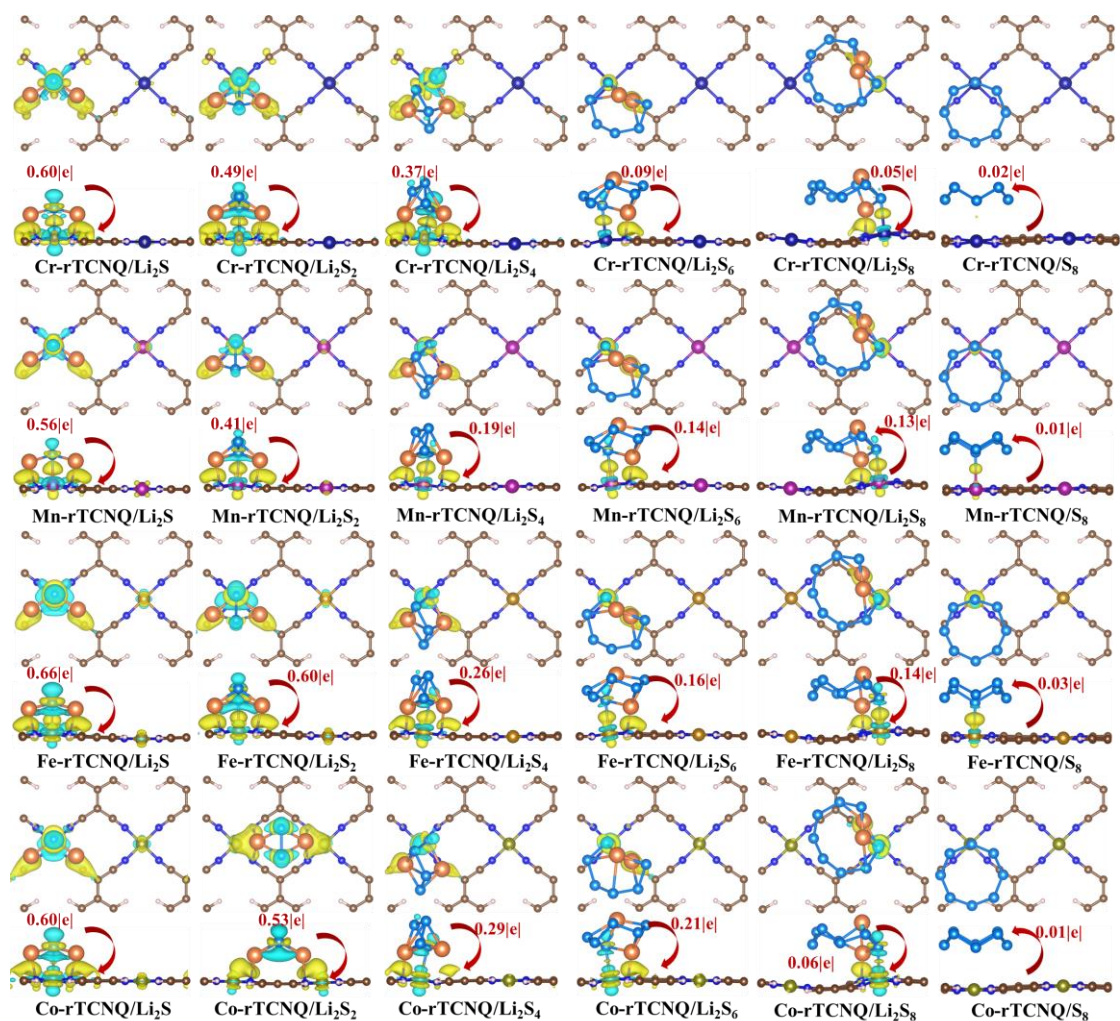

**Figure S6.** The charge density differences and the charge transfer amount of the adsorption systems of TM-rTCNQ (TM = Cr, Mn, Fe and Co) for  $\text{S}_8/\text{LiPSs}$ .

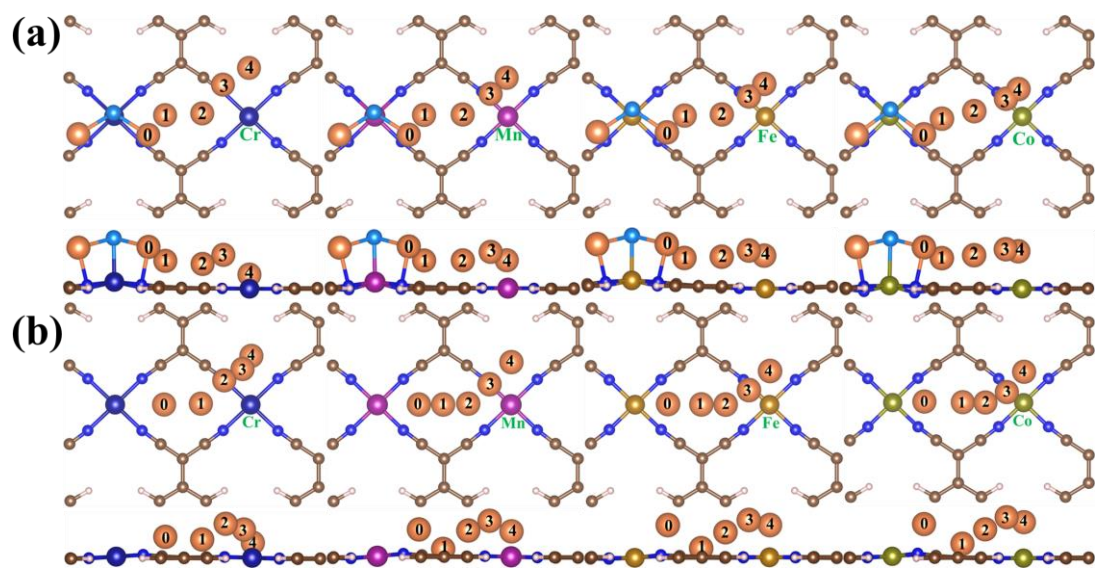

**Figure S7.** The  $\text{Li}_2\text{S}$  decomposition (a) and  $\text{Li}^+$  diffusion (b) pathways of TM-rTCNQ (TM = Cr, Mn, Fe and Co) structures.

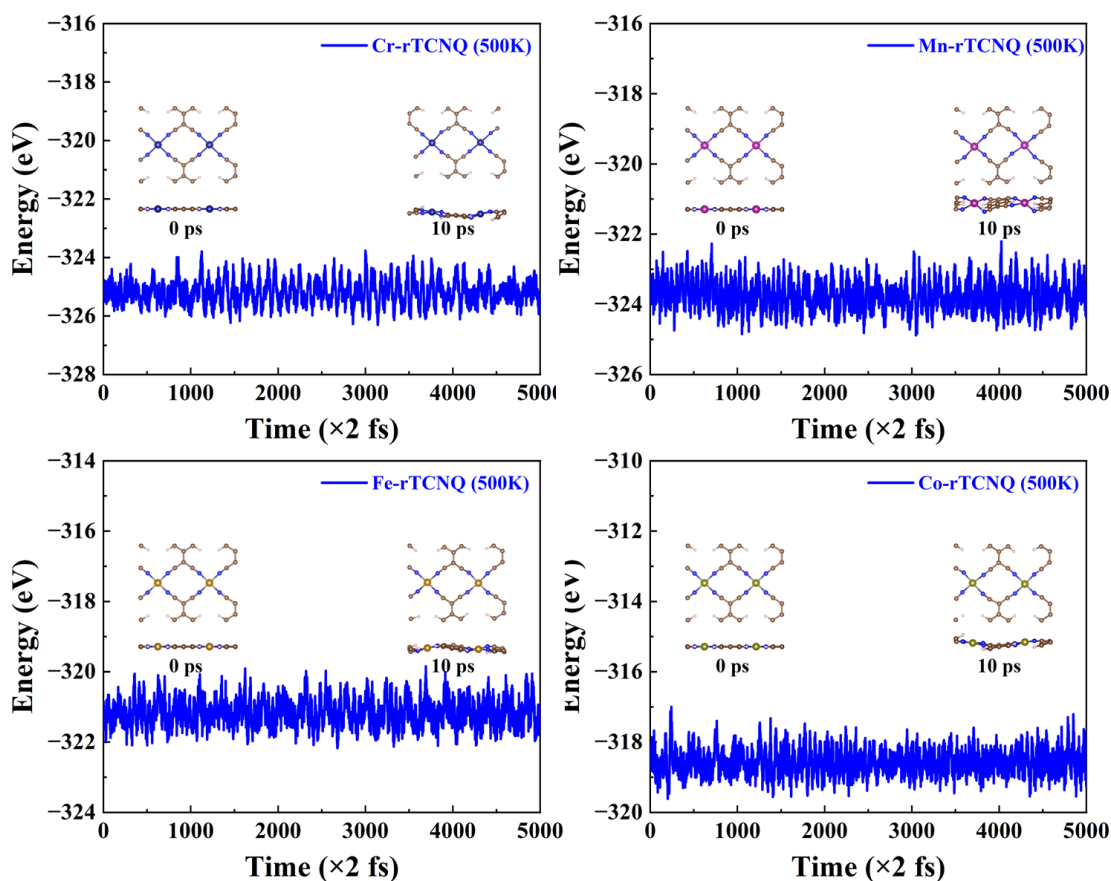

**Figure S8.** The AIMD simulation results of TM-rTCNQ (TM = Cr, Mn, Fe and Co) substrates at 500 K and 10 ps.

## 2. Supplementary Tables

**Table S1.** The lattice constants and the magnetic moments (Mag) of the unit cell of TM-rTCNQ (TM = Sc, Ti, V, Cr, Mn, Fe, Co, Ni, Cu and Zn) monolayers.

| TM-rTCNQ | Lattice Constant:<br>a (Å) | Lattice Constant:<br>b (Å) | Mag( $\mu_B$ ) |
|----------|----------------------------|----------------------------|----------------|
| Sc-rTCNQ | 7.165                      | 11.783                     | 0.000          |
| Ti-rTCNQ | 7.155                      | 11.568                     | 1.873          |
| V-rTCNQ  | 7.115                      | 11.434                     | 2.993          |
| Cr-rTCNQ | 7.062                      | 11.418                     | 3.888          |
| Mn-rTCNQ | 6.913                      | 11.361                     | 2.988          |
| Fe-rTCNQ | 6.884                      | 11.260                     | 1.899          |
| Co-rTCNQ | 6.809                      | 11.197                     | 0.000          |
| Ni-rTCNQ | 6.827                      | 11.196                     | 0.129          |
| Cu-rTCNQ | 6.784                      | 11.119                     | 0.000          |
| Zn-rTCNQ | 7.184                      | 11.393                     | 0.000          |

**Table S2.** The relative energies of Li<sub>2</sub>S dissociation pathways on TM-rTCNQ (TM = V, Cr, Mn, Fe and Co) monolayers.

| Structures | 0/eV | 1/eV | 2/eV | 3/eV | 4/eV |
|------------|------|------|------|------|------|
| V-rTCNQ    | 0    | 0.13 | 0.50 | 0.88 | 0.58 |
| Cr-rTCNQ   | 0    | 0.11 | 0.86 | 1.41 | 0.95 |
| Mn-rTCNQ   | 0    | 0.05 | 0.76 | 1.13 | 0.94 |
| Fe-rTCNQ   | 0    | 0.12 | 0.77 | 1.06 | 0.95 |
| Zn-rTCNQ   | 0    | 0.03 | 0.43 | 1.01 | 0.89 |

**Table S3.** The relative energies of Li<sup>+</sup> diffusion pathways on TM-rTCNQ (TM = V, Cr, Mn, Fe and Co) monolayers.

| Structures | 0/eV | 1/eV | 2/eV | 3/eV | 4/eV |
|------------|------|------|------|------|------|
| V-rTCNQ    | 0    | 0.02 | 0.41 | 0.17 | 0    |
| Cr-rTCNQ   | 0    | 0.01 | 0.53 | 0.21 | 0    |
| Mn-rTCNQ   | 0    | 0.04 | 0.01 | 0.26 | 0    |
| Fe-rTCNQ   | 0    | 0.24 | 0.06 | 0.15 | 0    |
| Zn-rTCNQ   | 0    | 0.23 | 0.04 | 0.14 | 0    |
